# Supplementary material
Source: MDPI journal article supplement (https://www.mdpi.com/2073-4441/14/20/3276)
Supplement: s1 [file s1]

# Supplementary Material

## 1. Full optimization results

The optimization results of the 10 runs (each with a different starting random seed) for each optimization method and decision variable set formulation are shown in Table S1. In addition, the number of generations and evaluations required for all runs are listed in Table S2.

**Table S1.** Full optimization results obtained from three optimization methods and four decision variable set formulations.

|       | Run No. | Formulation 1: 126DVs |              | Formulation 2: 4DVs |             | Formulation 3: 10DVs |             | Formulation 4: 34DVs |              |
|-------|---------|-----------------------|--------------|---------------------|-------------|----------------------|-------------|----------------------|--------------|
|       |         | Ave RMSE              | Run Time     | Ave RMSE            | Run Time    | Ave RMSE             | Run Time    | Ave RMSE             | Run Time     |
|       |         | (m)                   | (hr)         | (m)                 | (hr)        | (m)                  | (hr)        | (m)                  | (hr)         |
| SLSQP | 1       | 1.334                 | 4.48         | 1.709               | 0.02        | 1.469                | 0.08        | 1.407                | 0.57         |
|       | 2       | 1.330                 | 3.90         | 1.709               | 0.02        | 1.468                | 0.08        | 1.410                | 0.50         |
|       | 3       | 1.333                 | 3.82         | 1.709               | 0.02        | 1.468                | 0.08        | 1.410                | 0.57         |
|       | 4       | 1.334                 | 3.61         | 1.709               | 0.02        | 1.469                | 0.08        | 1.407                | 0.75         |
|       | 5       | 1.333                 | 4.93         | 1.709               | 0.01        | 1.468                | 0.10        | 1.409                | 0.57         |
|       | 6       | 1.333                 | 4.12         | 1.709               | 0.02        | 1.468                | 0.06        | 1.414                | 0.40         |
|       | 7       | 1.332                 | 3.86         | 1.709               | 0.01        | 1.469                | 0.08        | 1.410                | 0.40         |
|       | 8       | 1.332                 | 4.35         | 1.709               | 0.02        | 1.468                | 0.06        | 1.411                | 0.35         |
|       | 9       | 1.332                 | 4.68         | 1.709               | 0.02        | 1.468                | 0.09        | 1.407                | 0.44         |
|       | 10      | 1.332                 | 4.31         | 1.709               | 0.01        | 1.469                | 0.10        | 1.409                | 0.50         |
| Avg.  |         | <b>1.333</b>          | <b>4.21</b>  | <b>1.709</b>        | <b>0.02</b> | <b>1.468</b>         | <b>0.08</b> | <b>1.409</b>         | <b>0.51</b>  |
| GA    | 1       | 1.323                 | 44.69        | 1.709               | 0.77        | 1.468                | 4.56        | 1.400                | 23.70        |
|       | 2       | 1.322                 | 47.62        | 1.709               | 0.72        | 1.468                | 5.10        | 1.400                | 19.76        |
|       | 3       | 1.322                 | 45.81        | 1.709               | 0.68        | 1.468                | 4.44        | 1.405                | 20.38        |
|       | 4       | 1.322                 | 40.25        | 1.709               | 0.60        | 1.468                | 3.75        | 1.400                | 23.29        |
|       | 5       | 1.320                 | 69.43        | 1.709               | 0.64        | 1.468                | 4.60        | 1.400                | 23.15        |
|       | 6       | 1.323                 | 46.99        | 1.709               | 0.57        | 1.468                | 3.70        | 1.400                | 18.20        |
|       | 7       | 1.321                 | 58.08        | 1.709               | 0.49        | 1.468                | 4.16        | 1.400                | 23.05        |
|       | 8       | 1.322                 | 36.96        | 1.709               | 0.83        | 1.468                | 3.58        | 1.400                | 16.07        |
|       | 9       | 1.320                 | 67.86        | 1.709               | 0.70        | 1.468                | 4.75        | 1.400                | 22.89        |
|       | 10      | 1.324                 | 39.59        | 1.709               | 0.79        | 1.468                | 5.16        | 1.400                | 22.81        |
| Avg.  |         | <b>1.322</b>          | <b>49.73</b> | <b>1.709</b>        | <b>0.68</b> | <b>1.468</b>         | <b>4.38</b> | <b>1.400</b>         | <b>21.33</b> |
| DE    | 1       | 1.382                 | 15.67        | 1.709               | 0.87        | 1.468                | 2.00        | 1.401                | 10.33        |
|       | 2       | 1.380                 | 15.44        | 1.709               | 0.88        | 1.468                | 2.41        | 1.405                | 10.37        |
|       | 3       | 1.389                 | 15.97        | 1.709               | 0.88        | 1.468                | 2.35        | 1.407                | 10.77        |
|       | 4       | 1.383                 | 16.01        | 1.709               | 0.88        | 1.468                | 2.51        | 1.405                | 10.33        |
|       | 5       | 1.390                 | 15.80        | 1.709               | 0.78        | 1.468                | 2.52        | 1.410                | 10.24        |
|       | 6       | 1.381                 | 15.59        | 1.709               | 0.90        | 1.468                | 2.21        | 1.404                | 10.48        |
|       | 7       | 1.372                 | 16.41        | 1.709               | 0.93        | 1.468                | 2.57        | 1.403                | 10.67        |
|       | 8       | 1.392                 | 15.26        | 1.709               | 0.88        | 1.468                | 2.15        | 1.416                | 10.57        |
|       | 9       | 1.380                 | 15.72        | 1.709               | 1.03        | 1.468                | 2.62        | 1.403                | 10.36        |
|       | 10      | 1.388                 | 15.70        | 1.709               | 0.82        | 1.468                | 2.44        | 1.416                | 10.56        |
| Avg.  |         | <b>1.384</b>          | <b>15.76</b> | <b>1.709</b>        | <b>0.88</b> | <b>1.468</b>         | <b>2.38</b> | <b>1.407</b>         | <b>10.47</b> |

**Table S2.** The number of generations and evaluations required for all runs.

|       | Run No.     | Formulation 1: 126DVs |                    | Formulation 2: 4DVs |                    | Formulation 3: 10DVs |                    | Formulation 4: 34DVs |                    |
|-------|-------------|-----------------------|--------------------|---------------------|--------------------|----------------------|--------------------|----------------------|--------------------|
|       |             | No. of generations    | No. of evaluations | No. of generations  | No. of evaluations | No. of generations   | No. of evaluations | No. of generations   | No. of evaluations |
| SLSQP | 1           | 346                   | 43608              | 31                  | 173                | 64                   | 725                | 159                  | 5565               |
|       | 2           | 290                   | 36473              | 32                  | 177                | 66                   | 728                | 134                  | 4725               |
|       | 3           | 270                   | 33940              | 28                  | 156                | 63                   | 712                | 151                  | 5302               |
|       | 4           | 271                   | 34062              | 25                  | 142                | 70                   | 779                | 203                  | 7119               |
|       | 5           | 370                   | 46534              | 20                  | 105                | 88                   | 988                | 148                  | 5222               |
|       | 6           | 306                   | 38651              | 28                  | 148                | 51                   | 568                | 111                  | 3877               |
|       | 7           | 297                   | 37500              | 24                  | 129                | 71                   | 797                | 112                  | 3906               |
|       | 8           | 328                   | 41308              | 27                  | 150                | 54                   | 591                | 98                   | 3420               |
|       | 9           | 358                   | 45003              | 31                  | 169                | 76                   | 861                | 123                  | 4309               |
|       | 10          | 339                   | 42716              | 21                  | 120                | 85                   | 947                | 137                  | 4801               |
|       | <b>Avg.</b> | <b>318</b>            | <b>39980</b>       | <b>27</b>           | <b>147</b>         | <b>69</b>            | <b>770</b>         | <b>138</b>           | <b>4825</b>        |
| GA    | 1           | 1013                  | 405200             | 136                 | 6800               | 414                  | 41400              | 638                  | 223300             |
|       | 2           | 1094                  | 437600             | 138                 | 6900               | 465                  | 46500              | 527                  | 184450             |
|       | 3           | 1088                  | 435200             | 132                 | 6600               | 403                  | 40300              | 518                  | 181300             |
|       | 4           | 949                   | 379600             | 110                 | 5500               | 363                  | 36300              | 593                  | 207550             |
|       | 5           | 1625                  | 650000             | 119                 | 5950               | 430                  | 43000              | 618                  | 216300             |
|       | 6           | 1083                  | 433200             | 104                 | 5200               | 330                  | 33000              | 494                  | 172900             |
|       | 7           | 1334                  | 533600             | 92                  | 4600               | 393                  | 39300              | 602                  | 210700             |
|       | 8           | 861                   | 344400             | 154                 | 7700               | 336                  | 33600              | 421                  | 147350             |
|       | 9           | 1566                  | 626400             | 128                 | 6400               | 443                  | 44300              | 605                  | 211750             |
|       | 10          | 937                   | 374800             | 143                 | 7150               | 478                  | 47800              | 608                  | 212800             |
|       | <b>Avg.</b> | <b>1155</b>           | <b>462000</b>      | <b>126</b>          | <b>6280</b>        | <b>406</b>           | <b>40550</b>       | <b>562</b>           | <b>196840</b>      |
| DE    | 1           | 250                   | 100000             | 85                  | 8500               | 185                  | 18500              | 295                  | 100300             |
|       | 2           | 250                   | 100000             | 85                  | 8500               | 230                  | 23000              | 295                  | 100300             |
|       | 3           | 250                   | 100000             | 85                  | 8500               | 225                  | 22500              | 295                  | 100300             |
|       | 4           | 250                   | 100000             | 85                  | 8500               | 240                  | 24000              | 295                  | 100300             |
|       | 5           | 250                   | 100000             | 85                  | 8500               | 235                  | 23500              | 295                  | 100300             |
|       | 6           | 250                   | 100000             | 85                  | 8500               | 205                  | 20500              | 295                  | 100300             |
|       | 7           | 250                   | 100000             | 85                  | 8500               | 240                  | 24000              | 295                  | 100300             |
|       | 8           | 250                   | 100000             | 85                  | 8500               | 200                  | 20000              | 295                  | 100300             |
|       | 9           | 250                   | 100000             | 85                  | 8500               | 245                  | 24500              | 295                  | 100300             |
|       | 10          | 250                   | 100000             | 85                  | 8500               | 235                  | 23500              | 295                  | 100300             |
|       | <b>Avg.</b> | <b>250</b>            | <b>100000</b>      | <b>85</b>           | <b>8500</b>        | <b>224</b>           | <b>22400</b>       | <b>295</b>           | <b>100300</b>      |

## 2. Full evaluation results over the calibration period

The minimum average of the five RMSE values from the five pressure sensor locations is calculated to be 1.709 m. The breakdown of the average measured and modeled values, percentages, as well as the individual RMSE value at each monitoring site, is summarized in Table S3.

The field-observed HGL and flows versus the model-predicted values at each pressure monitoring site are shown in Figure S1 below. In general, a good match between the modeled and the observed values of each site has been achieved. Slight differences evident at some time steps can be caused by anomalies that occurred during the measurement process of pressures and instantaneous flows of individual outlets.

**Table S3.** Observed and simulated pressure data over the calibration period at each monitoring site.

| Pressure monitoring sites |                             |                         |                               |                              |                          |                                    |            |
|---------------------------|-----------------------------|-------------------------|-------------------------------|------------------------------|--------------------------|------------------------------------|------------|
| Pressure monitoring site  | Average observed HGL (m)    | Average modeled HGL (m) | Average observed pressure (m) | Average modeled pressure (m) | Average difference (m)   | Percentage difference in pressures | RMSE (m)   |
| RTU1                      | 141.36                      | 141.50                  | 70.62                         | 70.76                        | -0.13                    | -0.19%                             | 0.340      |
| RTU2                      | 138.57                      | 137.13                  | 69.54                         | 68.10                        | 1.43                     | 2.06%                              | 1.739      |
| RTU3                      | 131.95                      | 133.30                  | 70.04                         | 71.39                        | -1.35                    | -1.93%                             | 1.977      |
| RTU4                      | 135.66                      | 135.15                  | 72.92                         | 72.41                        | 0.52                     | 0.71%                              | 2.515      |
| RTU5                      | 131.72                      | 131.80                  | 62.10                         | 62.18                        | -0.07                    | -0.12%                             | 1.972      |
| Avg.                      |                             |                         |                               |                              |                          |                                    | 1.709      |
| Flow monitoring site      |                             |                         |                               |                              |                          |                                    |            |
| Flow monitoring site      | Average observed flow (L/s) |                         | Average modeled flow (L/s)    |                              | Average difference (L/s) | Percentage difference              | RMSE (L/s) |
| Sys_Flow                  | 2528                        |                         | 2501                          |                              | 27                       | 1.06%                              | 53         |

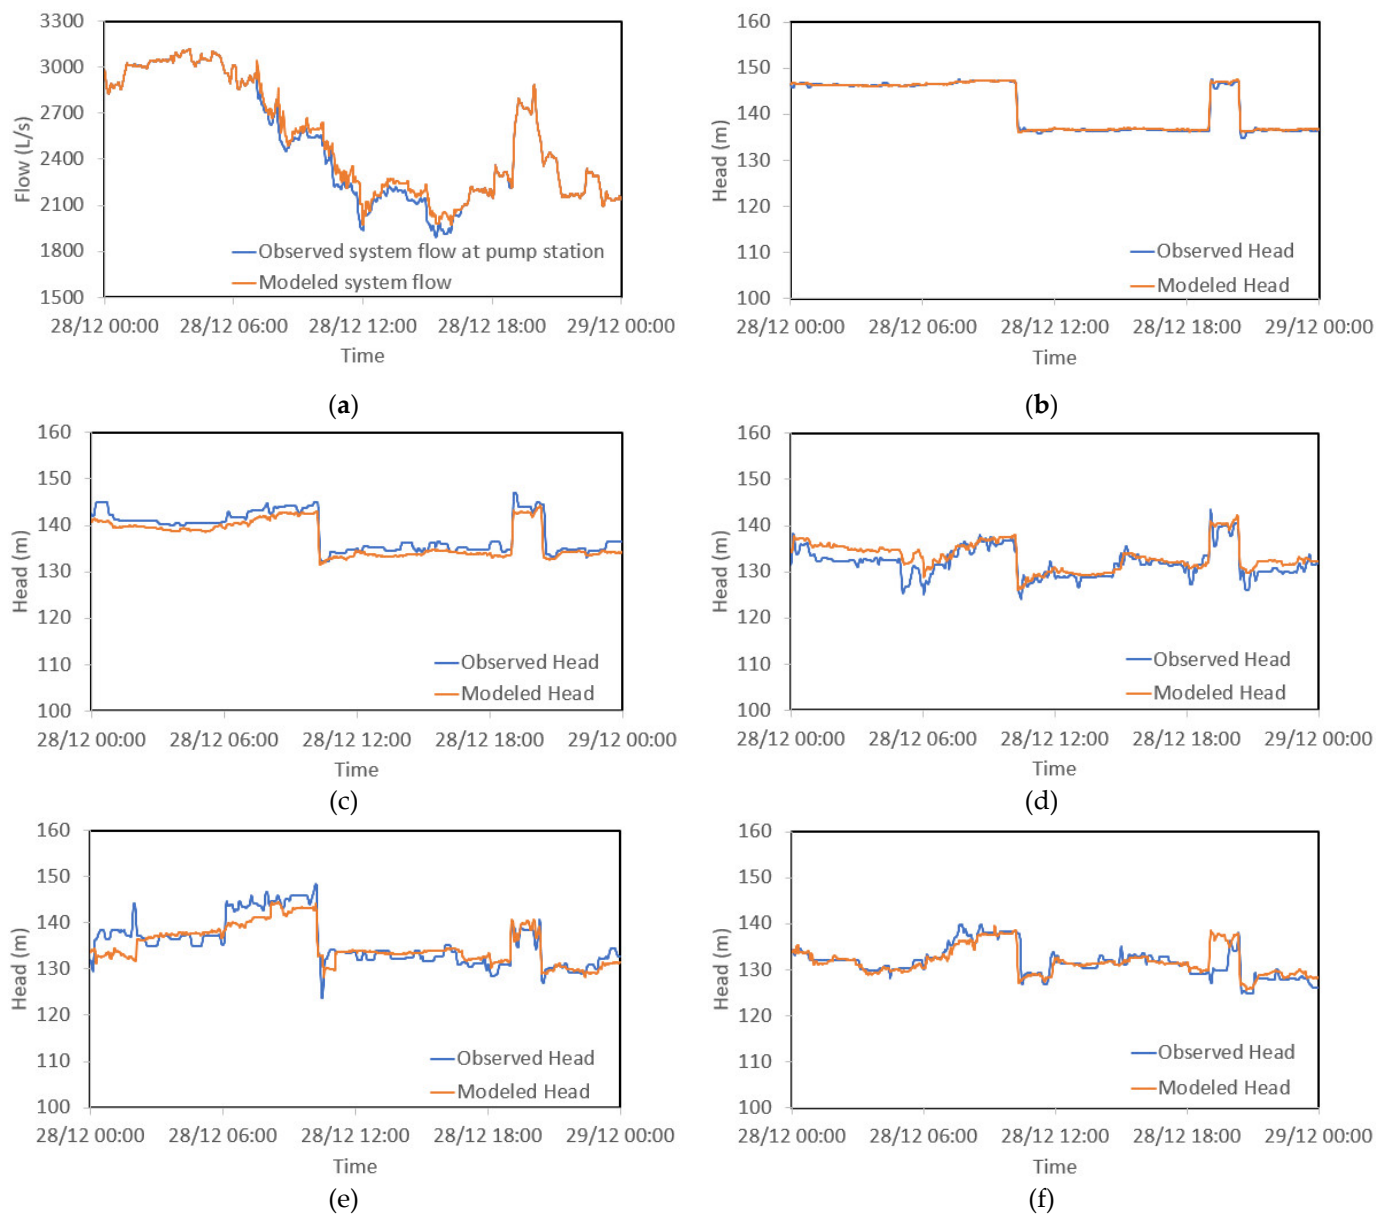

**Figure S1.** (a) Comparison of the observed and modeled system total flow during the calibration period; (b) to (f): Comparison of the observed and modeled HGL at RTU1 to RTU5 during the calibration period.
